# Supplementary material
Source: PubMed Central journal article supplement (PMC3434716)
Supplement: supp_194.13.3464_FigS1_TableS1.pdf [file supp_194.13.3464_FigS1_TableS1.pdf]

Supplemental Figure 1

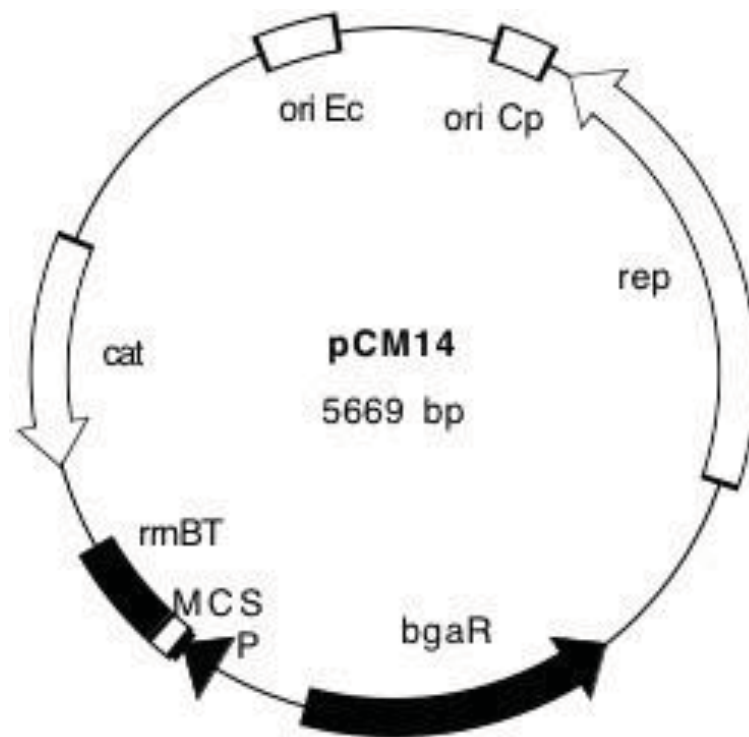

Supplemental Table 1. Top 20 mRNA transcripts expected to be preferentially cleaved by MazF-cd

| Locus   | Length | Expected | Actual | Probability | Gene  | Product                                                      |
|---------|--------|----------|--------|-------------|-------|--------------------------------------------------------------|
| CD3271  | 216    | 0.26     | 3      | 0.999844907 |       | hypothetical protein                                         |
| CD2087  | 2217   | 3.33     | 11     | 0.999816364 |       | putative xanthine dehydrogenase                              |
| CD2822  | 1173   | 1.33     | 6      | 0.999544771 |       | putative peptidase                                           |
| CD3001  | 903    | 1.37     | 6      | 0.999469843 |       | putative isomerase/hydrolase                                 |
| CD3214  | 870    | 1.45     | 6      | 0.999234905 |       | AraC family transcription regulator                          |
| CD2871  | 276    | 0.40     | 3      | 0.999224894 | uxaA' | altronate hydrolase (N-terminus)                             |
| CD2179  | 2178   | 3.43     | 10     | 0.999145211 |       | putative formate dehydrogenase                               |
| CD3167  | 498    | 0.76     | 4      | 0.998899679 |       | putative phosphatidylethanolamine-binding regulatory protein |
| CD1205  | 888    | 1.19     | 5      | 0.998552549 | ispA  | geranyltranstransferase                                      |
| CD2290  | 375    | 0.48     | 3      | 0.998504182 |       | putative regulatory protein                                  |
| CD2947A | 189    | 0.22     | 2      | 0.998427176 |       | hypothetical protein                                         |
| CD2523  | 573    | 0.85     | 4      | 0.998231443 |       | putative metal dependent phosphohydrolase                    |
| CD0928  | 210    | 0.23     | 2      | 0.998207969 |       | hypothetical protein                                         |
| CD2035  | 1092   | 2.21     | 7      | 0.997982875 |       | hypothetical protein                                         |
| CD2162  | 504    | 0.53     | 3      | 0.997885957 |       | putative acetyltransferase                                   |
| CD3259  | 870    | 1.31     | 5      | 0.99772789  |       | hypothetical protein                                         |
| CD1474  | 546    | 0.54     | 3      | 0.997688525 |       | putative ruberythrin                                         |
| CD2151  | 1170   | 1.80     | 6      | 0.997484208 |       | hypothetical protein                                         |
| CD1524  | 546    | 0.56     | 3      | 0.997412981 |       | putative ruberythrin                                         |
| CD2422  | 1464   | 2.30     | 7      | 0.997404528 | acp   | sodium/proton-dependent alanine carrier protein              |
